# Supplementary material
Source: publisher site journal article supplement (https://www.dovepress.com/article/586341)

## ***Supplementary Material 1: Supplementary methods***

### **Alternative definitions of type 2 inflammation for the sensitivity analyses**

The first approach classified patients as type 2 inflammation-positive if they had ≥2 eosinophil measurements that were >300 cells/μL during the period from day −365 to day 1,095, while those who did not meet this criterion were categorized as type 2 inflammation-negative. The second approach determined type 2 inflammation status using a beta distribution model applied to eosinophil measurements recorded from day −365 to day 0. In this model, patients were classified as having persistently high eosinophil levels if the probability that the proportion of eosinophil counts >300 cells/μL exceeding 0.75 was >0.7, and as having persistently low eosinophil levels if the probability that the proportion of eosinophil counts ≤300 cells/μL exceeding 0.75 was >0.7. Patients who did not meet either criterion were classified as having an intermediate level of type 2 inflammation. A third sensitivity analysis classified type 2 inflammation status based on the mean eosinophil count from day −365 to day 0, applying the same categories and thresholds as in the main analysis. Lastly, an alternative threshold for the maximum recorded eosinophil count was used in the fourth analysis, in which patients with a maximum eosinophil count of >150 cells/μL during the period from day −365 to day 0 were classified as type 2 inflammation-positive, while those with an eosinophil count of ≤150 cells/μL were classified as type 2 inflammation-negative.

## ***Supplementary Tables***

### **Supplementary Table 1 Diseases and medical procedures by ICD-10 codes**

|  | ICD-10 code |
| --- | --- |
| Diseases |  |
| COPD and COPD subtypes |  |
| COPD | J41–J44 |
| Bronchial asthma | J45 |
| Chronic bronchitis | J42 |
| Emphysema | J43 |
| Other COPD | J41, J44 |
| Infectious codes for COPD exacerbation |  |
| Influenza | J09–J11 |
| Viral pneumonia | J12 |
| Bacterial pneumonia | J13–J16 |
| Pneumonia, organism unspecified | J18 |
| Acute bronchitis | J20 |
| Acute bronchiolitis | J21 |
| Unspecified acute lower respiratory infection | J22 |
| COPD acute exacerbation | J440, J441 |
| Chemical pneumonitis | J680 |
| Abscess of lung with pneumonia | J851 |
| Legionnaires disease | A481 |
| Pneumonia in diseases classified elsewhere | J17 |
| Codes associated with respiratory failure for COPD exacerbation |  |
| Acute respiratory distress syndrome | J80 |
| Respiratory failure | J96 |
| Respiratory arrest | R092 |
| Major cardiovascular adverse events |  |
| Acute coronary syndrome | I21-I24 |
| Stroke | I60-I64 |
| Heart failure | I50 |
| Other comorbidities |  |
| Allergic comorbidities | J30, H101, L20, J328 |
| Allergic conjunctivitis | H101 |
| Allergic rhinitis | J30 |
| Anxiety disorder | F40–F48 |
| Atrial fibrillation | I48 |
| Aspergillus infection | B44 |
| Atopic dermatitis | L20 |
| Bronchiectasis | J47 |
| Chronic sinusitis | J32 |
| Depression | F30–F39 |
| Diabetes mellitus | E10–E14 |
| Disuse syndrome | M6259 |
| Eosinophilic sinusitis | J328 |
| Gastroesophageal reflux disease | K21 |
| Hypercapnia | J9601, J9611, J9691, R068 (7860015, 8830068) |
| Hyperlipidemia | E78 |
| Hypertension | I10–I15 |
| Interstitial pneumonia | J841, J849, J991 (8847737, 8840935, 8848278, 8848267, 8848302, 8848283, 8848245) |
| Lung cancer | C34 |
| Malignancy, excluding lung cancer, non-melanoma skin cancer, and hematological malignancy | C00-C29, C30-C33, C37-C39, C40-C43, C45-C49, C50-79, C80 |
| Pulmonary hypertension | I27 |
| Pulmonary embolism | I26 |
| Charlson comorbidity index (CCI) |  |
| Myocardial infarction | I21, I22, I25.2 |
| Congestive heart failure | I099, I110, I130, I132, I255, I420, I425–I429, I43, I50, P290 |
| Peripheral vascular disease | I70, I71, I731, I738, I739, I771, I790, I792, K551, K558, K559, Z958, Z959 |
| Cerebrovascular disease | G45, G46, H340, I60-I69 |
| Dementia | F00–03, F051, G30, G311 |
| Chronic pulmonary disease | I278, I279, J40–J47, J60–J67, J684, J701, J703 |
| Rheumatic disease | M05, M06, M315, M32–M34, M351, M353, M360 |
| Peptic ulcer disease | K25–K28 |
| Mild liver disease | B18, K700–K703, K709, K713–K715, K717, K73, K74, K760, K762–K764, K768, K769, Z944 |
| Diabetes without chronic complication | E100, E101, E106, E108, E109, E110, E111, E116, E118, E119, E120, E121, E126, E128, E129, E130, E131, E136, E138, E139, E140, E141, E146, E148, E149 |
| Diabetes with chronic complication | E102–E105, E107, E112–E115, E117, E122–E125, E127, E132– E135, E137, E142–E145, E147 |
| Hemiplegia or paraplegia | G041, G114, G801, G802, G81, G82, G830–G834, G839 |
| Renal disease | I120, I131, N032–N037, N052–N057, N18, N19, N250, Z490, Z491, Z492, Z940, Z992 |
| Any malignancy | C00–C26, C30–C34, C37–C41, C43, C45–C58, C60–C76, C81–C85, C88, C90–C97 |
| Moderate or severe liver disease | I850, I859, I864, I982, K704, K711, K721, K729, K765, K766, K767 |
| Metastatic solid tumor | C77–C80 |
| AIDS/HIV | B20–B22, B24 |
| Diseases associated with increased eosinophil counts |  |
| Allergic bronchopulmonary aspergillosis | B441 (8841312) |
| Angiolymphoid hyperplasia with eosinophilia | D180 (8848708) |
| Chronic eosinophilic leukemia/hypereosinophilic syndrome | D475, D721 (8841672) |
| Drug-induced hypersensitivity syndrome | L270 (8845614) |
| Ectoparasites | B85-B89 |
| Eosinophilia | D721 |
| Eosinophilia-myalgia syndrome | M358 |
| Eosinophilic cellulitis | L983 (8833453) |
| Eosinophilic esophagitis | K20 (8847750) |
| Eosinophilic fasciitis | M354 |
| Eosinophilic gastroenteritis | K528 (8833448) |
| Eosinophilic gastrointestinal diseases | K928 (8850983) |
| Eosinophilic granulomatosis with polyangiitis | M301 |
| Eosinophilic myocarditis | I408 (8850183) |
| Eosinophilic pustular folliculitis | L010 (8842088) |
| Helminth infection | B50-B58, B60-B83 |
| Hematological malignancies | C81-C96 |
| Hypopituitarism | E23 |
| Immune deficiency (excluding unspecific disease codes) | D80-D84 (excluding 8833982, 2793002, 8849748, 8840563, 2790015, 2790006, 2790010, 8836861) |
| Interstitial nephritis | N10 (5838004, 8832416, 5837001, 8840381), N12 (5839005, 8838516), N142 (9952036, 9959004, 8840719) |
| Kimura disease | D219 (8832252) |
| Mastocytosis | D470, Q822 (8839402) |
| Primary adrenal insufficiency | E271, E272 |
| Pulmonary eosinophilia | J82 |
| Sarcoidosis | D86 |
| Medical procedures |  |
| Emergency room visits |  |
| Emergency room visit | A000-A002, B001-2 |
| Emergency admission | A300, A301 |
| Home oxygen therapy | C103 |

Abbreviations: AIDS, acquired immunodeficiency syndrome; COPD, chronic obstructive pulmonary disease; HIV, human immunodeficiency virus; ICD-10, International Classification of Diseases, 10th Revision.

### **Supplementary Table 2** **Definitions of COPD treatment by WHO-ATC codes**

| Class | WHO-ATC code |
| --- | --- |
| SAMA |  |
| Ipratropium bromide hydrate | R03BB01 |
| Oxitropium bromide | R03BB02 |
| LAMA |  |
| Tiotropium bromide hydrate | R03BB04 |
| Glycopyrronium bromide | R03BB06 |
| Aclidinium bromide | R03BB05 |
| Umeclidinium bromide | R03BB07 |
| SABA |  |
| Salbutamol sulfate | R03AC02, R03CC02 |
| Terbutaline sulfate | R03CC03 |
| Procaterol hydrochloride | R03AC16, R03CC08 |
| Tulobuterol (oral use) | R03CC11 |
| LABA |  |
| Salmeterol xinafoate | R03AC12 |
| Formoterol fumarate hydrate | R03AC13 |
| Indacaterol maleate | R03AC18 |
| Tulobuterol (external use) | R03CC11 |
| Methylxanthine |  |
| Aminophylline | R03DA05 |
| Theophylline | R03DA04 |
| ICS |  |
| Beclometasone dipropionate | R03BA01 |
| Fluticasone propionate | R03BA05 |
| Fluticasone furoate | R03BA09 |
| Budesonide | R03BA02 |
| Ciclesonide | R03BA08 |
| Mometasone furoate | R03BA07 |
| LABA + ICS |  |
| Salmeterol xinafoate + fluticasone propionate | R03AK06 |
| Budesonide + formoterol fumarate hydrate | R03AK07 |
| Vilanterol trifenatate + fluticasone furoate | R03AK10 |
| LAMA + LABA |  |
| Indacaterol maleate + glycopyrronium bromide | R03AL04 |
| Umeclidinium bromide + vilanterol trifenatate | R03AL03 |
| Tiotropium bromide hydrate + olodaterol hydrochloride | R03AL06 |
| Glycopyrronium bromide + formoterol fumarate hydrate | R03AL07 |
| LAMA + LABA + ICS |  |
| Fluticasone furoate + umeclidinium bromide + vilanterol trifenatate | R03AL08 |
| Budesonide + glycopyrronium bromide + formoterol fumarate hydrate | R03AL11 |
| Systemic glucocorticoidsa |  |
| Betamethasone | H02AB01 |
| Dexamethasone | H02AB02 |
| Methylprednisolone | H02AB04 |
| Prednisolone | H02AB06 |
| Triamcinolone | H02AB08 |
| Mucoactive drugs |  |
| Bromhexine | R05CB02 |
| L-carbocisteine | R05CB03 |
| Ambroxol | R05CB06 |
| Fudosteine | R05CB (610451028, 610451030, 620001926, 620001927) |
| Acetylcysteine | R05CB01 |
| Antibiotics |  |
| Penicillins with extended spectrum | J01CA |
| Combinations of penicillins, including beta-lactamase inhibitors | J01CR |
| Second-generation cephalosporins | J01DC |
| Third-generation cephalosporins | J01DD |
| Fourth-generation cephalosporins | J01DE |
| Monobactams | J01DF |
| Carbapenems | J01DH |
| Other cephalosporins and penems | J01DI |
| Macrolides | J01FA |
| Erythromycin | J01FA01 |
| Lincosamides | J01FF |
| Streptogramins | J01FG |
| Aminoglycosides (excluding streptomycin) | J01GB |
| Fluoroquinolones | J01MA |
| Other quinolones | J01MB |
| Glycopeptide antibacterials | J01XA |
| Polymyxins | J01XB |
| Imidazole derivatives | J01XD |
| Other antibacterials | J01XX |

**a** Excluding agents for local injection, hydrocortisone, and cortisone.

**Abbreviations:** COPD, chronic obstructive pulmonary disease; ICS, inhaled corticosteroids; LABA, long-acting β2-agonists; LAMA, long-acting muscarinic antagonists; SABA, short-acting β2-agonists; SAMA, short-acting muscarinic antagonists; WHO-ATC, World Health Organization Anatomical Therapeutic Chemical.

**Supplementary Table 3 Charleston Comorbidity Index items at baseline**

| **Component, n (%)** | **Total (n=10,321)** | **Type 2 inflammation status** | | | **p-valuea** |
| --- | --- | --- | --- | --- | --- |
| **Low (n=1,423)** | **Intermediate (n=4,895)** | **High (n=4,003)** |
| Myocardial infarction | 833 (8.1) | 65 (4.6) | 367 (7.5) | 401 (10.0) | <0.001 |
| Congestive heart failure | 3,586 (34.7) | 434 (30.5) | 1,664 (34.0) | 1,488 (37.2) | <0.001 |
| Peripheral vascular disease | 2,008 (19.5) | 227 (16.0) | 935 (19.1) | 846 (21.1) | <0.001 |
| Cerebrovascular disease | 2,843 (27.5) | 377 (26.5) | 1,384 (28.3) | 1,082 (27.0) | 0.300 |
| Dementia | 488 (4.7) | 85 (6.0) | 226 (4.6) | 177 (4.4) | 0.053 |
| Chronic pulmonary disease | 10,279 (99.6) | 1,416 (99.5) | 4,873 (99.6) | 3,990 (99.7) | 0.600 |
| Rheumatic disease | 937 (9.1) | 116 (8.2) | 428 (8.7) | 393 (9.8) | 0.091 |
| Peptic ulcer disease | 4,017 (38.9) | 531 (37.3) | 1,859 (38.0) | 1,627 (40.6) | 0.015 |
| Mild liver disease | 2,801 (27.1) | 380 (26.7) | 1,343 (27.4) | 1,078 (26.9) | 0.800 |
| Diabetes without chronic complication | 759 (7.4) | 87 (6.1) | 344 (7.0) | 328 (8.2) | 0.017 |
| Diabetes with chronic complication | 954 (9.2) | 93 (6.5) | 407 (8.3) | 454 (11.3) | <0.001 |
| Hemiplegia or paraplegia | 198 (1.9) | 30 (2.1) | 85 (1.7) | 83 (2.1) | 0.400 |
| Renal disease | 950 (9.2) | 85 (6.0) | 379 (7.7) | 486 (12.1) | <0.001 |
| Any malignancy | 4,512 (43.7) | 646 (45.4) | 2,151 (43.9) | 1,715 (42.8) | 0.200 |
| Moderate or severe liver disease | 157 (1.5) | 26 (1.8) | 73 (1.5) | 58 (1.4) | 0.600 |
| Metastatic solid tumor | 650 (6.3) | 90 (6.3) | 295 (6.0) | 265 (6.6) | 0.500 |
| AIDS/HIV | 0 | 0 | 0 | 0 |  |

ap-values for χ2 tests (binary/categorical variables).

**Abbreviations:** AIDS, acquired immunodeficiency syndrome; HIV, human immunodeficiency virus

### **Supplementary Table 4** **Incidence rates and rate ratios for COPD exacerbations by type 2 inflammation status overall and in patients with or without bronchial asthma**

|  | Patients, n | Events, n | Follow-up, patient-years | Crude incidence (95% CI)a | Adjusted incidence(95% CI)a | Rate ratio vs Intermediate(95% CI) | Rate ratio (95% CI) (High vs low) |
| --- | --- | --- | --- | --- | --- | --- | --- |
| Overall population |  |  |  |  |  |  |  |
| Moderate COPD exacerbation |  |  |  |  |  |  |  |
| Type 2 inflammation status: Low | 1,423 | 1,447 | 3,402.1 | 42.5 (40.4, 44.8) | 41.6 (37.7, 46.0) | 0.94 (0.84, 1.05) | Ref |
| Type 2 inflammation status: Intermediate | 4,895 | 5,244 | 12,068.4 | 43.5 (42.3, 44.6) | 44.2 (42.0, 46.6) | Ref | – |
| Type 2 inflammation status: High | 4,003 | 5,123 | 9,836.1 | 52.1 (50.7, 53.5) | 52.0 (49.1, 55.0) | 1.17 (1.09, 1.27) | 1.25 (1.09, 1.43) |
| Severe COPD exacerbation |  |  |  |  |  |  |  |
| Type 2 inflammation status: Low | 1,423 | 367 | 3,402.1 | 10.8 (9.7, 12.0) | 10.3 (8.9, 11.9) | 0.97 (0.83, 1.15) | Ref |
| Type 2 inflammation status: Intermediate | 4,895 | 1,299 | 12,068.4 | 10.8 (10.2, 11.4) | 10.5 (9.8, 11.4) | Ref | – |
| Type 2 inflammation status: High | 4,003 | 1,147 | 9,836.1 | 11.7 (11.0, 12.4) | 11.8 (10.8, 12.8) | 1.12 (1.00, 1.25) | 1.14 (0.94, 1.39) |
| Moderate or severe COPD exacerbation |  |  |  |  |  |  |  |
| Type 2 inflammation status: Low | 1,423 | 1,814 | 3,402.1 | 53.3 (50.9, 55.8) | 54.6 (50.0, 59.6) | 0.95 (0.86, 1.05) | Ref |
| Type 2 inflammation status: Intermediate | 4,895 | 6,543 | 12,068.4 | 54.2 (52.9, 55.6) | 57.2 (54.6, 59.9) | Ref | – |
| Type 2 inflammation status: High | 4,003 | 6,270 | 9,836.1 | 63.7 (62.2, 65.3) | 66.3 (63.0, 69.7) | 1.16 (1.08, 1.24) | 1.21 (1.08, 1.37) |
| In patients without bronchial asthma |  |  |  |  |  |  |  |
| Moderate COPD exacerbation |  |  |  |  |  |  |  |
| Type 2 inflammation status: Low | 805 | 636 | 1,896.6 | 33.5 (31.0, 36.2) | 33.4 (28.9, 38.5) | 0.85 (0.72, 1.00) | Ref |
| Type 2 inflammation status: Intermediate | 2,830 | 2,684 | 6,901.1 | 38.9 (37.4, 40.4) | 39.3 (36.5, 42.3) | Ref | – |
| Type 2 inflammation status: High | 1,963 | 1,921 | 4,673.9 | 41.1 (39.3, 43.0) | 41.7 (38.2, 45.6) | 1.06 (0.95, 1.19) | 1.25 (1.02, 1.53) |
| Severe COPD exacerbation |  |  |  |  |  |  |  |
| Type 2 inflammation status: Low | 805 | 207 | 1,896.6 | 10.9 (9.5, 12.5) | 10.6 (8.8, 12.8) | 1.01 (0.82, 1.25) | Ref |
| Type 2 inflammation status: Intermediate | 2,830 | 717 | 6,901.1 | 10.4 (9.6, 11.2) | 10.5 (9.5, 11.7) | Ref | – |
| Type 2 inflammation status: High | 1,963 | 501 | 4,673.9 | 10.7 (9.8, 11.7) | 11.12 (9.9, 12.5) | 1.06 (0.90, 1.23) | 1.05 (0.80, 1.36) |
| Moderate or severe COPD exacerbation |  |  |  |  |  |  |  |
| Type 2 inflammation status: Low | 805 | 843 | 1,896.6 | 44.5 (41.5, 47.6) | 46.2 (40.8, 52.2) | 0.89 (0.77, 1.02) | Ref |
| Type 2 inflammation status: Intermediate | 2,830 | 3,401 | 6,901.1 | 49.3 (47.6, 51.0) | 52.1 (48.9, 55.5) | Ref | – |
| Type 2 inflammation status: High | 1,963 | 2,422 | 4,673.9 | 51.8 (49.8, 53.9) | 54.8 (50.8, 59.2) | 1.05 (0.95, 1.16) | 1.19 (1.00, 1.41) |
| In patients with bronchial asthma |  |  |  |  |  |  |  |
| Moderate COPD exacerbation |  |  |  |  |  |  |  |
| Type 2 inflammation status: Low | 618 | 811 | 1,505.5 | 53.9 (50.2, 57.7) | 52.4 (45.6, 60.2) | 1.04 (0.89, 1.22) | Ref |
| Type 2 inflammation status: Intermediate | 2,065 | 2,560 | 5,167.2 | 49.5 (47.6, 51.5) | 50.4 (46.7, 54.4) | Ref | – |
| Type 2 inflammation status: High | 2,040 | 3,202 | 5,162.2 | 62.0 (59.9, 64.2) | 61.3 (56.9, 66.1) | 1.22 (1.09, 1.35) | 1.17 (0.97, 1.41) |
| Severe COPD exacerbation |  |  |  |  |  |  |  |
| Type 2 inflammation status: Low | 618 | 160 | 1,505.5 | 10.6 (9.0, 12.4) | 9.7 (7.8, 12.2) | 0.94 (0.73, 1.21) | Ref |
| Type 2 inflammation status: Intermediate | 2,065 | 582 | 5,167.2 | 11.3 (10.4, 12.2) | 10.3 (9.2, 11.6) | Ref | – |
| Type 2 inflammation status: High | 2,040 | 646 | 5,162.2 | 12.5 (11.6, 13.5) | 11.8 (10.5, 13.2) | 1.14 (0.97, 1.34) | 1.21 (0.90, 1.63) |
| Moderate or severe COPD exacerbation |  |  |  |  |  |  |  |
| Type 2 inflammation status: Low | 618 | 971 | 1,505.5 | 64.5 (60.5, 68.7) | 65.2 (57.6, 73.8) | 1.03 (0.89, 1.19) | Ref |
| Type 2 inflammation status: Intermediate | 2,065 | 3,142 | 5,167.2 | 60.8 (58.7, 63.0) | 63.4 (59.2, 67.8) | Ref | – |
| Type 2 inflammation status: High | 2,040 | 3,848 | 5,162.2 | 74.5 (72.2, 76.9) | 76.2 (71.3, 81.5) | 1.20 (1.09, 1.32) | 1.17 (0.99, 1.38) |

**a** Per 100 patient-years.

**Abbreviations:** CI, confidence interval; COPD, chronic obstructive pulmonary disease; Ref, reference.

### **Supplementary Table 5** **Complete case analysis of the predictors of missing data on smoking history by logistic regression**

|  | Number of patients  (N=10,321) | Smoking history | | | p-value |
| --- | --- | --- | --- | --- | --- |
| Missing data, N (%) | Univariate odds ratio (95% CI) | Covariate-adjusted rate ratio (95% CI) |
| Demographic characteristics |  |  |  |  |  |
| Age categories, n (%) |  |  |  |  |  |
| 40–59 years | 887 (8.6) | 383 (43.2) | 1.67 (1.42, 1.97) | 1.42 (1.20, 1.69) | <0.001 |
| 60–69 years | 1,995 (19.3) | 623 (31.2) | Ref | Ref |  |
| 70–79 years | 4,177 (40.5) | 1,056 (25.3) | 0.75 (0.66, 0.84) | 0.80 (0.71, 0.90) |  |
| 80–89 years | 2,868 (27.8) | 671 (23.4) | 0.67 (0.59, 0.76) | 0.75 (0.65, 0.85) |  |
| ≥90 years | 394 (3.8) | 94 (23.9) | 0.69 (0.54, 0.89) | 0.78 (0.60, 1.02) |  |
| Sex, n (%) |  |  |  |  |  |
| Male | 6,946 (67.3) | 1,761 (25.4) | Ref | Ref | 0.005 |
| Female | 3,375 (32.7) | 1,066 (31.6) | 1.36 (1.24, 1.49) | 1.15 (1.04, 1.26) |  |
| Region |  |  |  |  |  |
| Hokkaido | 678 (6.6) | 137 (20.2) | 0.68 (0.56, 0.83) | 0.65 (0.53, 0.81) | <0.001 |
| Tohoku | 1,104 (10.7) | 285 (25.8) | 0.93 (0.80, 1.08) | 0.84 (0.72, 0.98) |  |
| Kanto | 1,014 (9.8) | 422 (41.6) | 1.91 (1.66, 2.20) | 1.79 (1.54, 2.07) |  |
| Chubu | 1,083 (10.5) | 218 (20.1) | 0.68 (0.57, 0.79) | 0.68 (0.58, 0.81) |  |
| Kinki | 4,643 (45.0) | 1,262 (27.2) | Ref | Ref |  |
| Chugoku | 1,089 (10.6) | 295 (27.1) | 1.00 (0.86, 1.15) | 0.89 (0.76, 1.04) |  |
| Shikoku | 291 (2.8) | 71 (24.4) | 0.86 (0.66, 1.14) | 0.82 (0.61, 1.09) |  |
| Kyushu or Okinawa | 419 (4.1) | 137 (32.7) | 1.30 (1.05, 1.61) | 1.16 (0.92, 1.45) |  |
| Hospital bed size |  |  |  |  |  |
| 0–19 | 1 (<0.1) | 1 (100.0) | >100 (0.00, >100) | >100 (0.00, >100) | <0.001 |
| 20–99 | 106 (1.0) | 51 (48.1) | 2.84 (1.92, 4.19) | 2.61 (1.74, 3.92) |  |
| 100–299 | 2,891 (28.0) | 978 (33.8) | 1.57 (1.40, 1.75) | 1.46 (1.30, 1.65) |  |
| 300–499 | 4,020 (38.9) | 984 (24.5) | 0.99 (0.89, 1.10) | 1.01 (0.90, 1.13) |  |
| 500+ | 3,303 (32.0) | 813 (24.6) | Ref | Ref |  |
| COPD subtypes |  |  |  |  |  |
| CB/emphysema |  |  |  |  |  |
| CB-dominant | 4,319 (41.8) | 1,306 (30.2) | 1.42 (1.28, 1.58) | 1.31 (1.17, 1.47) | <0.001 |
| Emphysema-dominant | 2,274 (22.0) | 622 (27.4) | 1.23 (1.09, 1.40) | 1.27 (1.12, 1.45) |  |
| CB and emphysema | 588 (5.7) | 165 (28.1) | 1.28 (1.05, 1.56) | 1.53 (1.24, 1.88) |  |
| Unspecified | 3,140 (30.4) | 734 (23.4) | Ref | Ref |  |
| Bronchial asthma |  |  |  |  |  |
| Yes | 4,723 (45.8) | 1,448 (30.7) | 1.35 (1.24, 1.48) | 1.26 (1.15, 1.38) | <0.001 |
| No | 5,598 (54.2) | 1,379 (24.6) | Ref | Ref |  |
| Comorbidities |  |  |  |  |  |
| Allergic comorbidities |  |  |  |  |  |
| Yes | 3,193 (30.9) | 1,005 (31.5) | 1.34 (1.22, 1.47) | 1.22 (1.11, 1.35) | <0.001 |
| No | 7,128 (69.1) | 1,822 (25.6) | Ref | Ref |  |
| Allergic rhinitis |  |  |  |  |  |
| Yes | 2,853 (27.6) | 917 (32.1) | 1.38 (1.25, 1.51) | 1.24 (1.12, 1.37) | <0.001 |
| No | 7,468 (72.4) | 1,910 (25.6) | Ref | Ref |  |
| Allergic conjunctivitis |  |  |  |  |  |
| Yes | 664 (6.4) | 193 (29.1) | 1.09 (0.92, 1.30) | 0.96 (0.80, 1.16) | 0.696 |
| No | 9,657 (93.6) | 2,634 (27.3) | Ref | Ref |  |
| Atopic dermatitis |  |  |  |  |  |
| Yes | 207 (2.0) | 72 (34.8) | 1.42 (1.07, 1.90) | 1.36 (1.00, 1.84) | 0.052 |
| No | 10,114 (98.0) | 2,755 (27.2) | Ref | Ref |  |
| Eosinophilic sinusitis |  |  |  |  |  |
| Yes | 24 (0.2) | 9 (37.5) | 1.59 (0.70, 3.64) | 1.09 (0.47, 2.56) | 0.837 |
| No | 10,297 (99.8) | 2,818 (27.4) | Ref | Ref |  |
| Chronic sinusitis |  |  |  |  |  |
| Yes | 1,171 (11.3) | 352 (30.1) | 1.16 (1.01, 1.32) | 1.10 (0.95, 1.26) | 0.194 |
| No | 9,150 (88.7) | 2,475 (27.0) | Ref | Ref |  |
| Bronchiectasis |  |  |  |  |  |
| Yes | 323 (3.1) | 108 (33.4) | 1.34 (1.06, 1.70) | 1.44 (1.12, 1.85) | 0.005 |
| No | 9,998 (96.9) | 2,719 (27.2) | Ref | Ref |  |
| Interstitial pneumonia |  |  |  |  |  |
| Yes | 1,039 (10.1) | 272 (26.2) | 0.93 (0.81, 1.08) | 1.03 (0.89, 1.20) | 0.684 |
| No | 9,282 (89.9) | 2,555 (27.5) | Ref | Ref |  |
| Lung cancer |  |  |  |  |  |
| Yes | 2,059 (19.9) | 436 (21.2) | 0.66 (0.59, 0.74) | 0.79 (0.70, 0.89) | <0.001 |
| No | 8,262 (80.1) | 2,391 (28.9) | Ref | Ref |  |
| Hypercapnia |  |  |  |  |  |
| Yes | 43 (0.4) | 9 (20.9) | 0.70 (0.34, 1.46) | 0.84 (0.38, 1.82) | 0.653 |
| No | 10,278 (99.6) | 2,818 (27.4) | Ref | Ref |  |
| Pulmonary hypertension |  |  |  |  |  |
| Yes | 152 (1.5) | 42 (27.6) | 1.01 (0.71, 1.45) | 1.06 (0.73, 1.55) | 0.756 |
| No | 10,169 (98.5) | 2,785 (27.4) | Ref | Ref |  |
| Pulmonary embolism |  |  |  |  |  |
| Yes | 113 (1.1) | 24 (21.2) | 0.71 (0.45, 1.12) | 0.74 (0.46, 1.19) | 0.213 |
| No | 10,208 (98.9) | 2,803 (27.5) | Ref | Ref |  |
| Diabetes mellitus |  |  |  |  |  |
| Yes | 4,983 (48.3) | 1,220 (24.5) | 0.75 (0.69, 0.82) | 0.80 (0.73, 0.87) | <0.001 |
| No | 5,338 (51.7) | 1,607 (30.1) | Ref | Ref |  |
| Hypertension |  |  |  |  |  |
| Yes | 6,412 (62.1) | 1,548 (24.1) | 0.65 (0.60, 0.71) | 0.69 (0.63, 0.76) | <0.001 |
| No | 3,909 (37.9) | 1,279 (32.7) | Ref | Ref |  |
| Hyperlipidemia |  |  |  |  |  |
| Yes | 4,441 (43.0) | 1,101 (24.8) | 0.79 (0.73, 0.87) | 0.75 (0.68, 0.82) | <0.001 |
| No | 5,880 (57.0) | 1,726 (29.4) | Ref | Ref |  |
| Atrial fibrillation |  |  |  |  |  |
| Yes | 1,466 (14.2) | 262 (17.9) | 0.53 (0.46, 0.61) | 0.56 (0.48, 0.65) | <0.001 |
| No | 8,855 (85.8) | 2,565 (29.0) | Ref | Ref |  |
| Gastroesophageal reflux disease |  |  |  |  |  |
| Yes | 5,231 (50.7) | 1,182 (22.6) | 0.61 (0.56, 0.67) | 0.63 (0.58, 0.70) | <0.001 |
| No | 5,090 (49.3) | 1,645 (32.3) | Ref | Ref |  |
| Disuse syndrome |  |  |  |  |  |
| Yes | 865 (8.4) | 142 (16.4) | 0.50 (0.41, 0.60) | 0.60 (0.50, 0.73) | <0.001 |
| No | 9,456 (91.6) | 2,685 (28.4) | Ref | Ref |  |
| Malignancy excluding lung cancer and non-melanoma skin cancer |  |  |  |  |  |
| Yes | 3,330 (32.3) | 646 (19.4) | 0.53 (0.48, 0.59) | 0.58 (0.52, 0.65) | <0.001 |
| No | 6,991 (67.7) | 2,181 (31.2) | Ref | Ref |  |
| Anxiety disorder |  |  |  |  |  |
| Yes | 1,504 (14.6) | 367 (24.4) | 0.83 (0.73, 0.95) | 0.80 (0.70, 0.91) | <0.001 |
| No | 8,817 (85.4) | 2,460 (27.9) | Ref | Ref |  |
| Depression |  |  |  |  |  |
| Yes | 807 (7.8) | 182 (22.6) | 0.76 (0.64, 0.90) | 0.73 (0.61, 0.87) | <0.001 |
| No | 9,514 (92.2) | 2,645 (27.8) | Ref | Ref |  |
| Osteoporosis |  |  |  |  |  |
| Yes | 1,672 (16.2) | 376 (22.5) | 0.73 (0.65, 0.83) | 0.72 (0.63, 0.82) | <0.001 |
| No | 8,649 (83.8) | 2,451 (28.3) | Ref | Ref |  |
| Bacterial pneumonia |  |  |  |  |  |
| Yes | 772 (7.5) | 143 (18.5) | 0.58 (0.48, 0.70) | 0.68 (0.56, 0.83) | <0.001 |
| No | 9,549 (92.5) | 2,684 (28.1) | Ref | Ref |  |
| Aspergillus infection |  |  |  |  |  |
| Yes | 84 (0.8) | 29 (34.5) | 1.40 (0.89, 2.20) | 1.88 (1.15, 3.08) | 0.012 |
| No | 10,237 (99.2) | 2,798 (27.3) | Ref | Ref |  |
| Viral pneumonia |  |  |  |  |  |
| Yes | 3 (<0.1) | 0 | 0.00 (0.00, >100) | 0.00 (0.00, >100) | 0.927 |
| No | 10,318 (100.0) | 2,827 (27.4) | Ref | Ref |  |
| CCI | | | | | |
| CCI score (unit=1) |  |  |  |  |  |
| Myocardial infarction |  |  |  |  |  |
| Yes | 833 (8.1) | 165 (19.8) | 0.63 (0.53, 0.76) | 0.67 (0.56, 0.81) | <0.001 |
| No | 9,488 (91.9) | 2,662 (28.1) | Ref | Ref |  |
| Congestive heart failure |  |  |  |  |  |
| Yes | 3,586 (34.7) | 806 (22.5) | 0.68 (0.62, 0.74) | 0.72 (0.65, 0.79) | <0.001 |
| No | 6,735 (65.3) | 2,021 (30.0) | Ref | Ref |  |
| Peripheral vascular disease |  |  |  |  |  |
| Yes | 2,008 (19.5) | 434 (21.6) | 0.68 (0.61, 0.77) | 0.72 (0.64, 0.81) | <0.001 |
| No | 8,313 (80.5) | 2,393 (28.8) | Ref | Ref |  |
| Cerebrovascular disease |  |  |  |  |  |
| Yes | 2,843 (27.5) | 639 (22.5) | 0.70 (0.63, 0.78) | 0.77 (0.69, 0.86) | <0.001 |
| No | 7,478 (72.5) | 2,188 (29.3) | Ref | Ref |  |
| Dementia |  |  |  |  |  |
| Yes | 488 (4.7) | 98 (20.1) | 0.65 (0.52, 0.82) | 0.77 (0.61, 0.98) | 0.032 |
| No | 9,833 (95.3) | 2,729 (27.8) | Ref | Ref |  |
| Chronic pulmonary disease |  |  |  |  |  |
| Yes | 10,279 (99.6) | 2,827 (27.5) | >100 (0.00, >100) | >100 (0.00, >100) | 0.918 |
| No | 42 (0.4) | 0 | Ref | Ref |  |
| Rheumatic disease |  |  |  |  |  |
| Yes | 937 (9.1) | 214 (22.8) | 0.77 (0.65, 0.90) | 0.72 (0.61, 0.85) | <0.001 |
| No | 9,384 (90.9) | 2,613 (27.8) | Ref | Ref |  |
| Peptic ulcer disease |  |  |  |  |  |
| Yes | 4,017 (38.9) | 948 (23.6) | 0.73 (0.66, 0.80) | 0.79 (0.72, 0.87) | <0.001 |
| No | 6,304 (61.1) | 1,879 (29.8) | Ref | Ref |  |
| Mild liver disease |  |  |  |  |  |
| Yes | 2,801 (27.1) | 640 (22.8) | 0.72 (0.65, 0.80) | 0.76 (0.68, 0.84) | <0.001 |
| No | 7,520 (72.9) | 2,187 (29.1) | Ref | Ref |  |
| Diabetes without chronic complications |  |  |  |  |  |
| Yes | 759 (7.4) | 144 (19.0) | 0.60 (0.50, 0.72) | 0.64 (0.53, 0.78) | <0.001 |
| No | 9,562 (92.6) | 2,683 (28.1) | Ref | Ref |  |
| Diabetes with chronic complications |  |  |  |  |  |
| Yes | 954 (9.2) | 200 (21.0) | 0.68 (0.58, 0.80) | 0.68 (0.57, 0.80) | <0.001 |
| No | 9,367 (90.8) | 2,627 (28.0) | Ref | Ref |  |
| Hemiplegia or paraplegia |  |  |  |  |  |
| Yes | 198 (1.9) | 42 (21.2) | 0.71 (0.50, 1.00) | 0.78 (0.55, 1.11) | 0.166 |
| No | 10,123 (98.1) | 2,785 (27.5) | Ref | Ref |  |
| Renal disease |  |  |  |  |  |
| Yes | 950 (9.2) | 165 (17.4) | 0.53 (0.45, 0.63) | 0.57 (0.47, 0.68) | <0.001 |
| No | 9,371 (90.8) | 2,662 (28.4) | Ref | Ref |  |
| Any malignancy |  |  |  |  |  |
| Yes | 4,512 (43.7) | 931 (20.6) | 0.54 (0.49, 0.59) | 0.80 (0.62, 1.02) | 0.073 |
| No | 5,809 (56.3) | 1,896 (32.6) | Ref | Ref |  |
| Moderate or severe liver disease |  |  |  |  |  |
| Yes | 157 (1.5) | 35 (22.3) | 0.76 (0.52, 1.11) | 0.86 (0.58, 1.28) | 0.459 |
| No | 10,164 (98.5) | 2,792 (27.5) | Ref | Ref |  |
| Metastatic solid tumor |  |  |  |  |  |
| Yes | 650 (6.3) | 101 (15.5) | 0.47 (0.38, 0.58) | 0.75 (0.59, 0.95) | 0.019 |
| No | 9,671 (93.7) | 2,726 (28.2) | Ref | Ref |  |
| Visit histories and medical procedures | | | | | |
| Outpatient visits per montha | - |  |  |  |  |
| Number of hospitalizations |  |  |  |  |  |
| 0 | 6,301 (61.1) | 2,290 (36.3) | Ref | Ref | <0.001 |
| 1 | 2,461 (23.8) | 353 (14.3) | 0.29 (0.26, 0.33) | 0.32 (0.28, 0.37) |  |
| ≥2 | 1,559 (15.1) | 184 (11.8) | 0.23 (0.20, 0.28) | 0.29 (0.25, 0.35) |  |
| History of moderate or severe pulmonary infection or respiratory failure |  |  |  |  |  |
| 0 | 9,695 (93.9) | 2,812 (29.0) | Ref | Ref | <0.001 |
| 1 | 556 (5.4) | 15 (2.7) | 0.07 (0.04, 0.11) | 0.08 (0.05, 0.14) |  |
| ≥2 | 70 (0.7) | 0 | 0.00 (0.00, >100) | 0.00 (0.00, >100) |  |
| Home oxygen therapy |  |  |  |  |  |
| Yes | 292 (2.8) | 64 (21.9) | 0.74 (0.56, 0.98) | 0.95 (0.70, 1.27) | 0.714 |
| No | 10,029 (97.2) | 2,763 (27.6) | Ref | Ref |  |
| Systemic glucocorticoids |  |  |  |  |  |
| Yes | 1,887 (18.3) | 438 (23.2) | 0.76 (0.68, 0.86) | 0.82 (0.72, 0.93) | 0.002 |
| No | 8,434 (81.7) | 2,389 (28.3) | Ref | Ref |  |

a Log-transformed.

**Abbreviations:** CB, chronic bronchitis; CCI, Charlson Comorbidity Index; CI, confidence interval; COPD, chronic obstructive pulmonary disease; Ref, reference.

### **Supplementary Table 6** **Complete case analysis of the predictors of missing data on body mass index by logistic regression**

|  | **Number of patients**  **(N=10,321)** | **BMI** | | | **p-value** |
| --- | --- | --- | --- | --- | --- |
| **Missing data, N (%)** | **Univariate odds ratio (95% CI)** | **Covariate-adjusted rate ratio (95% CI)** |
| **Demographic characteristics** |  |  |  |  |  |
| Age categories, n (%) |  |  |  |  |  |
| 40–59 years | 887 (8.6) | 676 (76.2) | 0.99 (0.82, 1.19) | 0.87 (0.72, 1.05) | 0.008 |
| 60–69 years | 1,995 (19.3) | 1,525 (76.4) | Ref | Ref |  |
| 70–79 years | 4,177 (40.5) | 3,027 (72.5) | 0.81 (0.72, 0.92) | 0.85 (0.75, 0.96) |  |
| 80–89 years | 2,868 (27.8) | 2,077 (72.4) | 0.81 (0.71, 0.92) | 0.86 (0.75, 0.98) |  |
| ≥90 years | 394 (3.8) | 268 (68.0) | 0.66 (0.52, 0.83) | 0.66 (0.52, 0.83) |  |
| Sex, n (%) |  |  |  |  |  |
| Male | 6,946 (67.3) | 5,020 (72.3) | Ref | Ref | 0.191 |
| Female | 3,375 (32.7) | 2,553 (75.6) | 1.19 (1.08, 1.31) | 1.07 (0.97, 1.18) |  |
| Region |  |  |  |  |  |
| Hokkaido | 678 (6.6) | 403 (59.4) | 0.49 (0.41, 0.57) | 0.47 (0.40, 0.56) | <0.001 |
| Tohoku | 1,104 (10.7) | 791 (71.6) | 0.84 (0.72, 0.97) | 0.80 (0.69, 0.93) |  |
| Kanto | 1,014 (9.8) | 834 (82.2) | 1.54 (1.29, 1.83) | 1.43 (1.20, 1.71) |  |
| Chubu | 1,083 (10.5) | 684 (63.2) | 0.57 (0.49, 0.65) | 0.57 (0.49, 0.66) |  |
| Kinki | 4,643 (45.0) | 3,487 (75.1) | Ref | Ref |  |
| Chugoku | 1,089 (10.6) | 863 (79.2) | 1.27 (1.08, 1.49) | 1.21 (1.03, 1.43) |  |
| Shikoku | 291 (2.8) | 217 (74.6) | 0.97 (0.74, 1.28) | 0.86 (0.65, 1.14) |  |
| Kyushu or Okinawa | 419 (4.1) | 294 (70.2) | 0.78 (0.63, 0.97) | 0.67 (0.54, 0.84) |  |
| Hospital bed size |  |  |  |  |  |
| 0–19 | 1 (<0.1) | 1 (100.0) | >100 (0.00, >100) | >100 (0.00, >100) | <0.001 |
| 20–99 | 106 (1.0) | 94 (88.7) | 3.07 (1.68, 5.63) | 2.87 (1.56, 5.28) |  |
| 100–299 | 2,891 (28.0) | 2,317 (80.1) | 1.58 (1.41, 1.78) | 1.43 (1.26, 1.62) |  |
| 300–499 | 4,020 (38.9) | 2,789 (69.4) | 0.89 (0.80, 0.98) | 0.88 (0.79, 0.97) |  |
| 500+ | 3,303 (32.0) | 2,372 (71.8) | Ref | Ref |  |
| **COPD subtypes** |  |  |  |  |  |
| CB/emphysema |  |  |  |  |  |
| CB-dominant | 4,319 (41.8) | 3,228 (74.7) | 1.58 (1.43, 1.74) | 1.50 (1.35, 1.67) | <0.001 |
| Emphysema-dominant | 2,274 (22.0) | 1,803 (79.3) | 2.04 (1.80, 2.31) | 2.08 (1.83, 2.37) |  |
| CB and emphysema | 588 (5.7) | 494 (84.0) | 2.80 (2.22, 3.54) | 3.06 (2.41, 3.88) |  |
| Unspecified | 3,140 (30.4) | 2,048 (65.2) | Ref | Ref |  |
| Bronchial asthma |  |  |  |  |  |
| Yes | 4,723 (45.8) | 3,654 (77.4) | 1.46 (1.34, 1.60) | 1.41 (1.28, 1.55) | <0.001 |
| No | 5,598 (54.2) | 3,919 (70.0) | Ref | Ref |  |
| **Comorbidities** |  |  |  |  |  |
| Allergic comorbidities |  |  |  |  |  |
| Yes | 3,193 (30.9) | 2,465 (77.2) | 1.34 (1.21, 1.48) | 1.29 (1.16, 1.42) | <0.001 |
| No | 7,128 (69.1) | 5,108 (71.7) | Ref | Ref |  |
| Allergic rhinitis |  |  |  |  |  |
| Yes | 2,853 (27.6) | 2,213 (77.6) | 1.36 (1.23, 1.50) | 1.30 (1.17, 1.44) | <0.001 |
| No | 7,468 (72.4) | 5,360 (71.8) | Ref | Ref |  |
| Allergic conjunctivitis |  |  |  |  |  |
| Yes | 664 (6.4) | 510 (76.8) | 1.22 (1.01, 1.46) | 1.13 (0.93, 1.36) | 0.225 |
| No | 9,657 (93.6) | 7,063 (73.1) | Ref | Ref |  |
| Atopic dermatitis |  |  |  |  |  |
| Yes | 207 (2.0) | 156 (75.4) | 1.11 (0.81, 1.53) | 1.10 (0.80, 1.53) | 0.561 |
| No | 10,114 (98.0) | 7,417 (73.3) | Ref | Ref |  |
| Eosinophilic sinusitis |  |  |  |  |  |
| Yes | 24 (0.2) | 17 (70.8) | 0.88 (0.36, 2.13) | 0.72 (0.30, 1.75) | 0.467 |
| No | 10,297 (99.8) | 7,556 (73.4) | Ref | Ref |  |
| Chronic sinusitis |  |  |  |  |  |
| Yes | 1,171 (11.3) | 920 (78.6) | 1.38 (1.19, 1.59) | 1.34 (1.16, 1.56) | <0.001 |
| No | 9,150 (88.7) | 6,653 (72.7) | Ref | Ref |  |
| Bronchiectasis |  |  |  |  |  |
| Yes | 323 (3.1) | 264 (81.7) | 1.65 (1.24, 2.19) | 1.68 (1.25, 2.25) | <0.001 |
| No | 9,998 (96.9) | 7,309 (73.1) | Ref | Ref |  |
| Interstitial pneumonia |  |  |  |  |  |
| Yes | 1,039 (10.1) | 787 (75.7) | 1.15 (0.99, 1.33) | 1.19 (1.02, 1.39) | 0.025 |
| No | 9,282 (89.9) | 6,786 (73.1) | Ref | Ref |  |
| Lung cancer |  |  |  |  |  |
| Yes | 2,059 (19.9) | 1,409 (68.4) | 0.74 (0.66, 0.82) | 0.82 (0.74, 0.92) | <0.001 |
| No | 8,262 (80.1) | 6,164 (74.6) | Ref | Ref |  |
| Hypercapnia |  |  |  |  |  |
| Yes | 43 (0.4) | 29 (67.4) | 0.75 (0.40, 1.42) | 0.78 (0.41, 1.50) | 0.464 |
| No | 10,278 (99.6) | 7,544 (73.4) | Ref | Ref |  |
| Pulmonary hypertension |  |  |  |  |  |
| Yes | 152 (1.5) | 114 (75.0) | 1.09 (0.75, 1.58) | 1.04 (0.71, 1.51) | 0.843 |
| No | 10,169 (98.5) | 7,459 (73.4) | Ref | Ref |  |
| Pulmonary embolism |  |  |  |  |  |
| Yes | 113 (1.1) | 75 (66.4) | 0.71 (0.48, 1.06) | 0.70 (0.47, 1.05) | 0.082 |
| No | 10,208 (98.9) | 7,498 (73.5) | Ref | Ref |  |
| Diabetes mellitus |  |  |  |  |  |
| Yes | 4,983 (48.3) | 3,538 (71.0) | 0.79 (0.72, 0.86) | 0.81 (0.74, 0.89) | <0.001 |
| No | 5,338 (51.7) | 4,035 (75.6) | Ref | Ref |  |
| Hypertension |  |  |  |  |  |
| Yes | 6,412 (62.1) | 4,552 (71.0) | 0.72 (0.66, 0.79) | 0.71 (0.65, 0.79) | <0.001 |
| No | 3,909 (37.9) | 3,021 (77.3) | Ref | Ref |  |
| Hyperlipidemia |  |  |  |  |  |
| Yes | 4,441 (43.0) | 3,193 (71.9) | 0.88 (0.80, 0.96) | 0.82 (0.75, 0.90) | <0.001 |
| No | 5,880 (57.0) | 4,380 (74.5) | Ref | Ref |  |
| Atrial fibrillation |  |  |  |  |  |
| Yes | 1,466 (14.2) | 947 (64.6) | 0.61 (0.55, 0.69) | 0.60 (0.53, 0.68) | <0.001 |
| No | 8,855 (85.8) | 6,626 (74.8) | Ref | Ref |  |
| Gastroesophageal reflux disease |  |  |  |  |  |
| Yes | 5,231 (50.7) | 3,651 (69.8) | 0.69 (0.63, 0.75) | 0.71 (0.65, 0.78) | <0.001 |
| No | 5,090 (49.3) | 3,922 (77.1) | Ref | Ref |  |
| Disuse syndrome |  |  |  |  |  |
| Yes | 865 (8.4) | 474 (54.8) | 0.40 (0.35, 0.46) | 0.42 (0.37, 0.49) | <0.001 |
| No | 9,456 (91.6) | 7,099 (75.1) | Ref | Ref |  |
| Malignancy excluding lung cancer and non-melanoma skin cancer |  |  |  |  |  |
| Yes | 3,330 (32.3) | 2,172 (65.2) | 0.55 (0.50, 0.60) | 0.57 (0.52, 0.63) | <0.001 |
| No | 6,991 (67.7) | 5,401 (77.3) | Ref | Ref |  |
| Anxiety disorder |  |  |  |  |  |
| Yes | 1,504 (14.6) | 1,104 (73.4) | 1.00 (0.89, 1.13) | 0.99 (0.87, 1.13) | 0.918 |
| No | 8,817 (85.4) | 6,469 (73.4) | Ref | Ref |  |
| Depression |  |  |  |  |  |
| Yes | 807 (7.8) | 563 (69.8) | 0.82 (0.70, 0.96) | 0.81 (0.69, 0.95) | 0.01 |
| No | 9,514 (92.2) | 7,010 (73.7) | Ref | Ref |  |
| Osteoporosis |  |  |  |  |  |
| Yes | 1,672 (16.2) | 1,223 (73.1) | 0.99 (0.88, 1.11) | 0.96 (0.84, 1.08) | 0.486 |
| No | 8,649 (83.8) | 6,350 (73.4) | Ref | Ref |  |
| Bacterial pneumonia |  |  |  |  |  |
| Yes | 772 (7.5) | 463 (60.0) | 0.51 (0.44, 0.60) | 0.54 (0.46, 0.63) | <0.001 |
| No | 9,549 (92.5) | 7,110 (74.5) | Ref | Ref |  |
| Aspergillus infection |  |  |  |  |  |
| Yes | 84 (0.8) | 61 (72.6) | 0.96 (0.59, 1.56) | 1.07 (0.65, 1.76) | 0.78 |
| No | 10,237 (99.2) | 7,512 (73.4) | Ref | Ref |  |
| Viral pneumonia |  |  |  |  |  |
| Yes | 3 (0.0) | 1 (33.3) | 0.18 (0.02, 2.00) | 0.28 (0.03, 3.19) | 0.308 |
| No | 10,318 (100.0) | 7,572 (73.4) | Ref | Ref |  |
| **CCI** | | | | | |
| CCI score (unit=1) |  | 7,573 (73.4) | 0.88 (0.87, 0.90) | 0.92 (0.90, 0.94) | <0.001 |
| Myocardial infarction |  |  |  |  |  |
| Yes | 833 (8.1) | 552 (66.3) | 0.69 (0.59, 0.80) | 0.70 (0.60, 0.82) | <0.001 |
| No | 9,488 (91.9) | 7,021 (74.0) | Ref | Ref |  |
| Congestive heart failure |  |  |  |  |  |
| Yes | 3,586 (34.7) | 2,484 (69.3) | 0.73 (0.67, 0.80) | 0.71 (0.65, 0.78) | <0.001 |
| No | 6,735 (65.3) | 5,089 (75.6) | Ref | Ref |  |
| Peripheral vascular disease |  |  |  |  |  |
| Yes | 2,008 (19.5) | 1,414 (70.4) | 0.83 (0.75, 0.93) | 0.83 (0.75, 0.93) | 0.001 |
| No | 8,313 (80.5) | 6,159 (74.1) | Ref | Ref |  |
| Cerebrovascular disease |  |  |  |  |  |
| Yes | 2,843 (27.5) | 2,040 (71.8) | 0.89 (0.81, 0.98) | 0.93 (0.84, 1.02) | 0.135 |
| No | 7,478 (72.5) | 5,533 (74.0) | Ref | Ref |  |
| Dementia |  |  |  |  |  |
| Yes | 488 (4.7) | 313 (64.1) | 0.63 (0.52, 0.77) | 0.64 (0.52, 0.78) | <0.001 |
| No | 9,833 (95.3) | 7,260 (73.8) | Ref | Ref |  |
| Chronic pulmonary disease |  |  |  |  |  |
| Yes | 10,279 (99.6) | 7,571 (73.7) | 55.92 (13.51, >100) | 53.30 (12.81, >100) | <0.001 |
| No | 42 (0.4) | 2 (4.8) | Ref | Ref |  |
| Rheumatic disease |  |  |  |  |  |
| Yes | 937 (9.1) | 704 (75.1) | 1.11 (0.95, 1.29) | 1.06 (0.90, 1.24) | 0.472 |
| No | 9,384 (90.9) | 6,869 (73.2) | Ref | Ref |  |
| Peptic ulcer disease |  |  |  |  |  |
| Yes | 4,017 (38.9) | 2,873 (71.5) | 0.86 (0.78, 0.94) | 0.92 (0.84, 1.01) | 0.07 |
| No | 6,304 (61.1) | 4,700 (74.6) | Ref | Ref |  |
| Mild liver disease |  |  |  |  |  |
| Yes | 2,801 (27.1) | 1,989 (71.0) | 0.85 (0.77, 0.94) | 0.90 (0.81, 0.99) | 0.035 |
| No | 7,520 (72.9) | 5,584 (74.3) | Ref | Ref |  |
| Diabetes without chronic complications |  |  |  |  |  |
| Yes | 759 (7.4) | 471 (62.1) | 0.57 (0.49, 0.66) | 0.57 (0.49, 0.67) | <0.001 |
| No | 9,562 (92.6) | 7,102 (74.3) | Ref | Ref |  |
| Diabetes with chronic complications |  |  |  |  |  |
| Yes | 954 (9.2) | 692 (72.5) | 0.95 (0.82, 1.11) | 0.94 (0.81, 1.10) | 0.457 |
| No | 9,367 (90.8) | 6,881 (73.5) | Ref | Ref |  |
| Hemiplegia or paraplegia |  |  |  |  |  |
| Yes | 198 (1.9) | 139 (70.2) | 0.85 (0.63, 1.16) | 0.86 (0.63, 1.17) | 0.338 |
| No | 10,123 (98.1) | 7,434 (73.4) | Ref | Ref |  |
| Renal disease |  |  |  |  |  |
| Yes | 950 (9.2) | 609 (64.1) | 0.62 (0.54, 0.71) | 0.63 (0.54, 0.72) | <0.001 |
| No | 9,371 (90.8) | 6,964 (74.3) | Ref | Ref |  |
| Any malignancy |  |  |  |  |  |
| Yes | 4,512 (43.7) | 3,028 (67.1) | 0.57 (0.52, 0.62) | 0.82 (0.66, 1.01) | 0.065 |
| No | 5,809 (56.3) | 4,545 (78.2) | Ref | Ref |  |
| Moderate or severe liver disease |  |  |  |  |  |
| Yes | 157 (1.5) | 97 (61.8) | 0.58 (0.42, 0.80) | 0.64 (0.46, 0.89) | 0.008 |
| No | 10,164 (98.5) | 7,476 (73.6) | Ref | Ref |  |
| Metastatic solid tumor |  |  |  |  |  |
| Yes | 650 (6.3) | 386 (59.4) | 0.51 (0.43, 0.59) | 0.75 (0.63, 0.90) | 0.002 |
| No | 9,671 (93.7) | 7,187 (74.3) | Ref | Ref |  |
| **Visit histories and medical procedures** | | | | | |
| Outpatient visits per montha | - | 7,573 (73.4) | 0.90 (0.88, 0.93) | 0.91 (0.89, 0.94) | <0.001 |
| Number of hospitalizations |  |  |  |  |  |
| 0 | 6,301 (61.1) | 6,194 (98.3) | Ref | Ref | <0.001 |
| 1 | 2,461 (23.8) | 880 (35.8) | 0.01 (0.01, 0.01) | 0.01 (0.01, 0.01) |  |
| ≥2 | 1,559 (15.1) | 499 (32.0) | 0.01 (0.01, 0.01) | 0.01 (0.01, 0.01) |  |
| History of moderate or severe pulmonary infection or respiratory failure |  |  |  |  |  |
| 0 | 9,695 (93.9) | 7,550 (77.9) | Ref | Ref | <0.001 |
| 1 | 556 (5.4) | 22 (4.0) | 0.01 (0.01, 0.02) | 0.01 (0.01, 0.02) |  |
| ≥2 | 70 (0.7) | 1 (1.4) | 0.00 (0.00, 0.03) | 0.00 (0.00, 0.03) |  |
| Home oxygen therapy |  |  |  |  |  |
| Yes | 292 (2.8) | 183 (62.7) | 0.60 (0.47, 0.76) | 0.64 (0.50, 0.82) | <0.001 |
| No | 10,029 (97.2) | 7,390 (73.7) | Ref | Ref |  |
| Systemic glucocorticoids |  |  |  |  |  |
| Yes | 1,887 (18.3) | 1,167 (61.8) | 0.51 (0.46, 0.57) | 0.51 (0.45, 0.57) | <0.001 |
| No | 8,434 (81.7) | 6,406 (76.0) | Ref | Ref |  |

a Log-transformed.

**Abbreviations:** BMI, body mass index; CB, chronic bronchitis; CCI, Charlson comorbidity index; CI, confidence interval; COPD, chronic obstructive pulmonary disease; Ref, reference.

### **Supplementary Table 7** **Incidence rates and rate ratios for COPD exacerbations by type 2 inflammation status in patients with a smoking history**

|  | Patients, n | Events, n | Follow-up, patient-years | Crude incidence (95% CI)a | Adjusted incidence(95% CI)a | Rate ratio(95% CI) | Rate ratio (95% CI) (High vs low) |
| --- | --- | --- | --- | --- | --- | --- | --- |
| Moderate COPD exacerbation |  |  |  |  |  |  |  |
| Type 2 inflammation status: Low | 587 | 487 | 1,415.4 | 34.4 (31.4, 37.6) | 36.9 (31.5, 43.2) | 0.85 (0.72, 1.01) | Ref |
| Type 2 inflammation status: Intermediate | 2,160 | 2,343 | 5,328.4 | 44.0 (42.2, 45.8) | 43.2 (40.2, 46.5) | Ref | – |
| Type 2 inflammation status: High | 1,806 | 2,342 | 4,419.8 | 53.0 (50.9, 55.2) | 48.6 (44.9, 52.6) | 1.12 (1.01, 1.25) | 1.32 (1.07, 1.63) |
| Severe COPD exacerbation |  |  |  |  |  |  |  |
| Type 2 inflammation status: Low | 587 | 221 | 1,415.4 | 15.6 (13.6, 17.8) | 11.8 (9.8, 14.3) | 0.98 (0.80, 1.21) | Ref |
| Type 2 inflammation status: Intermediate | 2,160 | 830 | 5,328.4 | 15.6 (14.5, 16.7) | 12.1 (11.0, 13.3) | Ref | – |
| Type 2 inflammation status: High | 1,806 | 712 | 4,419.8 | 16.1 (15.0, 17.3) | 13.0 (11.8, 14.4) | 1.08 (0.94, 1.24) | 1.10 (0.86, 1.42) |
| Moderate or severe COPD exacerbation |  |  |  |  |  |  |  |
| Type 2 inflammation status: Low | 587 | 708 | 1,415.4 | 50.0 (46.4, 53.8) | 50.5 (44.2, 57.6) | 0.88 (0.76, 1.02) | Ref |
| Type 2 inflammation status: Intermediate | 2,160 | 3,173 | 5,328.4 | 59.6 (57.5, 61.7) | 57.5 (54.0, 61.3) | Ref | – |
| Type 2 inflammation status: High | 1,806 | 3,054 | 4,419.8 | 69.1 (66.7, 71.6) | 63.9 (59.6, 68.4) | 1.11 (1.01, 1.22) | 1.27 (1.06, 1.51) |

**a** Per 100 patient-years.

**Abbreviations:** CI, confidence interval; COPD, chronic obstructive pulmonary disease; Ref, reference.

### **Supplementary Table 8** **Incidence rates and rate ratios for MACE by type 2 inflammation status**

|  | Patients, n | Events, n | Follow-up, patient-years | Crude incidence (95% CI)a | Adjusted incidence(95% CI)a | Rate ratio vs Intermediate(95% CI) | Rate ratio (95% CI) (High vs low) |
| --- | --- | --- | --- | --- | --- | --- | --- |
| Type 2 inflammation status: Low | 1,423 | 100 | 3,402.1 | 2.9 (2.4, 3.6) | 2.5 (1.9, 3.3) | 0.81 (0.60, 1.09) | Ref |
| Type 2 inflammation status: Intermediate | 4,895 | 439 | 12,068.4 | 3.6 (3.3, 4.0) | 3.1 (2.7, 3.5) | Ref | – |
| Type 2 inflammation status: High | 4,003 | 364 | 9,836.1 | 3.7 (3.3, 4.1) | 3.3 (2.8, 3.8) | 1.06 (0.87, 1.29) | 1.30 (0.91, 1.88) |

**a** Per 100 patient-years.

**Abbreviations:** CI, confidence interval; MACE, major adverse cardiovascular event; Ref, reference.

### **Supplementary Table 9** **Other secondary outcomes – medication use and health resource utilization**

| Outcomes | Total (n=10,321) | Type 2 inflammation status | | |
| --- | --- | --- | --- | --- |
| Low (n=1,423) | Intermediate (n=4,895) | High (n=4,003) |
| Short-term use of oral and intravenous systemic glucocorticoids |  |  |  |  |
| Patients, n (%) | 2,502 (24.2) | 302 (21.2) | 1,090 (22.3) | 1,110 (27.7) |
| Events, n | 12,851 | 1,446 | 5,492 | 5,913 |
| Total follow-up duration, years | 25,306.50 | 3,402.10 | 12,068.40 | 9,836.10 |
| Incidence rate, events/100 patient-years (95% CI) | 50.78 (49.91, 51.67) | 42.50 (40.34, 44.75) | 45.51 (44.31, 46.73) | 60.12 (58.59, 61.67) |
| Duration, days/episodea |  |  |  |  |
| Mean (SD) | 3.6 (3.0) | 3.6 (2.8) | 3.5 (2.9) | 3.7 (3.1) |
| Median (IQR) | 3.0 (1.0, 5.0) | 3.0 (1.0, 5.5) | 3.0 (1.0, 5.0) | 3.0 (1.0, 5.0) |
| Range | 1.0–36.0 | 1.0–14.0 | 1.0–31.0 | 1.0–36.0 |
| Duration categories, n (%)a |  |  |  |  |
| 1–2 days | 1,494 (59.7) | 175 (57.9) | 665 (61.0) | 654 (58.9) |
| 3–7 days | 1,390 (55.6) | 166 (55.0) | 594 (54.5) | 630 (56.8) |
| 8–14 days | 506 (20.2) | 66 (21.9) | 211 (19.4) | 229 (20.6) |
| Dose, mg/daya |  |  |  |  |
| Mean (SD) | 90.9 (206.5) | 85.0 (158.7) | 96.7 (237.7) | 86.8 (183.7) |
| Median (IQR) | 44.0 (29.0, 69.1) | 44.0 (27.1, 60.5) | 44.0 (29.1, 70.1) | 44.0 (29.5, 72.1) |
| Range | 20.0–3,750.0 | 20.0–1,250.0 | 20.0–3,750.0 | 20.0–3,750.0 |
| Short-term use of oral systemic glucocorticoids |  |  |  |  |
| Patients, n (%) | 1,265 (12.3) | 136 (9.6) | 549 (11.2) | 580 (14.5) |
| Events, n | 4,028 | 411 | 1,602 | 2,015 |
| Total follow-up duration, years | 25,306.50 | 3,402.10 | 12,068.40 | 9,836.10 |
| Incidence rate, events/100 patient-years (95% CI) | 15.92 (15.43, 16.42) | 12.08 (10.94, 13.31) | 13.27 (12.63, 13.94) | 20.49 (19.60, 21.40) |
| Duration, days/episodea |  |  |  |  |
| Mean (SD) | 5.0 (3.1) | 4.4 (2.3) | 4.9 (3.0) | 5.3 (3.4) |
| Median (IQR) | 4.7 (3.0, 6.2) | 4.0 (3.0, 6.0) | 4.5 (3.0, 6.0) | 5.0 (3.0, 6.4) |
| Range | 1.0–36.0 | 1.0–13.0 | 1.0–31.0 | 1.0–36.0 |
| Duration categories, n (%)a |  |  |  |  |
| 1–2 days | 316 (25.0) | 36 (26.5) | 152 (27.7) | 128 (22.1) |
| 3–7 days | 969 (76.6) | 108 (79.4) | 411 (74.9) | 450 (77.6) |
| 8–14 days | 264 (20.9) | 24 (17.6) | 108 (19.7) | 132 (22.8) |
| Dose, mg/daya |  |  |  |  |
| Mean (SD) | 28.6 (14.4) | 29.2 (17.4) | 29.7 (16.6) | 27.4 (10.8) |
| Median (IQR) | 26.0 (20.0, 30.0) | 25.0 (20.0, 30.0) | 26.7 (20.0, 30.0) | 25.0 (20.0–30.0) |
| Range | 2.0–294.9 | 8.0–190.0 | 2.0–294.9 | 4.7, 150.0 |
| Short-term use of intravenous systemic glucocorticoids |  |  |  |  |
| Patients, n (%) | 1,993 (19.3) | 242 (17.0) | 864 (17.7) | 887 (22.2) |
| Events, n | 10,405 | 1,212 | 4,517 | 4,676 |
| Total follow-up duration, years | 25,306.50 | 3,402.10 | 12,068.40 | 9,836.10 |
| Incidence rate, events/100 patient-years (95% CI) | 41.12 (40.33, 41.91) | 35.63 (33.65, 37.69) | 37.43 (36.34, 38.54) | 47.54 (46.19, 48.92) |
| Duration, days/episodea |  |  |  |  |
| Mean (SD) | 2.3 (2.2) | 2.8 (2.7) | 2.3 (2.2) | 2.2 (2.0) |
| Median (IQR) | 1.0 (1.0, 3.0) | 1.2 (1.0, 4.0) | 1.0 (1.0, 3.0) | 1.0 (1.0, 3.0) |
| Range | 1.0–14.0 | 1.0–14.0 | 1.0–14.0 | 1.0–14.0 |
| Duration categories, n (%)a |  |  |  |  |
| 1–2 days | 1,555 (78.0) | 174 (71.9) | 683 (79.1) | 698 (78.7) |
| 3–7 days | 678 (34.0) | 87 (36.0) | 289 (33.4) | 302 (34.0) |
| 8–14 days | 191 (9.6) | 35 (14.5) | 89 (10.3) | 67 (7.6) |
| Dose, mg/daya |  |  |  |  |
| Mean (SD) | 124.7 (254.3) | 121.1 (267.2) | 131.1 (284.0) | 119.4 (217.6) |
| Median (IQR) | 51.9 (44.0, 125.0) | 50.0 (40.0, 87.5) | 50.0 (42.5, 124.8) | 53.3 (44.0, 135.7) |
| Range | 15.0–3,750.0 | 20.0–2,500.0 | 15.0–3,750.0 | 20.0–3,750.0 |
| Continuous use of systemic glucocorticoids |  |  |  |  |
| Patients, n (%) | 2,330 (22.6) | 281 (19.7) | 996 (20.3) | 1,053 (26.3) |
| Duration, days/longest episode/persona |  |  |  |  |
| Mean (SD) | 187.5 (298.9) | 214.9 (315.7) | 172.9 (287.2) | 194.0 (304.5) |
| Median (IQR) | 28.0 (5.0, 238.0) | 38.0 (6.0, 315.0) | 27.0 (5.0, 210.0) | 27.0 (5.0, 252.0) |
| Range | 1.0–1,092.0 | 1.0–1,078.0 | 1.0–1,092.0 | 1.0–1,092.0 |
| Dose of systemic glucocorticoids (except short-term glucocorticoids) |  |  |  |  |
| Patients, n (%) | 1,688 (16.4) | 212 (14.9) | 724 (14.8) | 752 (18.8) |
| Dose, mg/daya |  |  |  |  |
| Mean (SD) | 9.6 (7.5) | 8.8 (5.6) | 9.8 (7.8) | 9.6 (7.7) |
| Median (IQR) | 7.7 (5.0, 12.5) | 7.5 (5.0, 10.5) | 7.9 (5.0, 13.3) | 7.5 (5.0, 12.3) |
| Range | 0.5–70.0 | 0.5–37.8 | 0.5–70.0 | 0.5–56.7 |
| PDC for oral glucocorticoids |  |  |  |  |
| Patients, n (%) | 2,330 (22.6) | 281 (19.7) | 996 (20.3) | 1,053 (26.3) |
| Mean (SD) | 26.1 (34.3) | 30.3 (36.6) | 24.4 (33.5) | 26.6 (34.4) |
| Median (IQR) | 5.6 (1.0, 45.3) | 6.8 (1.1, 62.8) | 5.1 (0.9, 39.4) | 6.4 (1.0, 46.9) |
| Range | 0.1–99.7 | 0.1–98.7 | 0.1–99.7 | 0.1–99.7 |
| PDC categories, n (%) |  |  |  |  |
| 0–20% | 1,494 (64.1) | 167 (59.4) | 663 (66.6) | 664 (63.1) |
| 21–40% | 219 (9.4) | 27 (9.6) | 86 (8.6) | 106 (10.1) |
| 41–80% | 236 (10.1) | 28 (10.0) | 99 (9.9) | 109 (10.4) |
| >80% | 381 (16.4) | 59 (21.0) | 148 (14.9) | 174 (16.5) |
| Duration of hospitalization due to COPD exacerbation, days/year |  |  |  |  |
| Patients, n (%) | 1,878 (18.2) | 254 (17.8) | 861 (17.6) | 763 (19.1) |
| Mean (SD) | 37.0 (49.8) | 37.6 (44.3) | 39.3 (59.3) | 34.3 (38.3) |
| Median (IQR) | 22.0 (11.0, 46.0) | 25.0 (13.0, 51.0) | 23.0 (12.0, 46.0) | 20.0 (10.0, 44.0) |
| Range | 1.0–977.0 | 1.0–436.0 | 1.0–977.0 | 1.0–347.0 |
| Emergency room visits |  |  |  |  |
| Patients, n (%) | 4,600 (44.6) | 659 (46.3) | 2,199 (44.9) | 1,742 (43.5) |
| Events, n | 30,182 | 3,927 | 13,116 | 13,139 |
| Total follow-up duration, years | 25,306.50 | 3,402.10 | 12,068.40 | 9,836.10 |
| Incidence rate, events/100 patient-years (95% CI) | 119.27 (117.92, 120.62) | 115.43 (111.85, 119.10) | 108.68 (106.83, 110.56) | 133.58 (131.31, 135.88) |
| Medication use during follow-up, n (%) |  |  |  |  |
| LABA monotherapy | 3,187 (30.9) | 425 (29.9) | 1,582 (32.3) | 1,180 (29.5) |
| LAMA monotherapy | 3,049 (29.5) | 397 (27.9) | 1,472 (30.1) | 1,180 (29.5) |
| LAMA + LABAb | 2,558 (24.8) | 321 (22.6) | 1,250 (25.5) | 987 (24.7) |
| LABA + ICSc | 3,290 (31.9) | 390 (27.4) | 1,430 (29.2) | 1,470 (36.7) |
| LABA + LAMA + ICSd | 545 (5.3) | 72 (5.1) | 218 (4.5) | 255 (6.4) |
| Methylxanthine | 1,658 (16.1) | 186 (13.1) | 785 (16.0) | 687 (17.2) |
| Systemic glucocorticoids | 3,292 (31.9) | 411 (28.9) | 1,419 (29.0) | 1,462 (36.5) |
| Mucoactive drugs | 6,202 (60.1) | 825 (58.0) | 2,976 (60.8) | 2,401 (60.0) |
| Antibiotics excluding macrolides | 6,978 (67.6) | 949 (66.7) | 3,313 (67.7) | 2,716 (67.8) |
| Erythromycin | 523 (5.1) | 78 (5.5) | 244 (5.0) | 201 (5.0) |

a Calculated for patients who were prescribed glucocorticoids.

b Fixed-dose LAMA/LABA or prescription of LAMA and LABA on the same date.

c Fixed-dose LABA/ICS or prescription of LABA and ICS on the same date.

d Fixed-dose LAMA/LABA/ICS or prescription of LAMA, LABA, and ICS on the same date.

**Abbreviations:** CI, confidence interval; COPD, chronic obstructive pulmonary disease; ICS, inhaled corticosteroids; IQR, interquartile range; LABA, long-acting β2-agonists; LAMA, long-acting muscarinic antagonists; PDC, proportion of days covered; SD, standard deviation.

## ***Supplementary Figures***

**Supplementary Figure 1** **Sensitivity analyses of adjusted incidence rates and rate ratios for COPD exacerbations (primary outcome) using alternative definitions of type 2 inflammation status.**Sensitivity analysis 1: Patients with ≥2 eosinophil measurements >300 cells/μL from day −365 to 1,095 were classified as type 2 inflammation-positive; others were classified as negative.

Sensitivity analysis 2: A beta distribution model applied to eosinophil counts from day −365 to 0 classified patients as having persistently high (probability that the proportion of eosinophil counts >300 cells/μL exceeding 0.75 was larger than 0.7), persistently low (probability that the proportion of eosinophil counts ≤300 cells/μL exceeding 0.75 was larger than 0.7), or intermediate eosinophil levels (otherwise); ie, to qualify as persistently high (or low), patients with 3 to 6 measurements were not allowed to have any eosinophil count ≤300 cells/μL (or >300 cells/μL), patients with 7 to 11 measurements were allowed to have only 1 eosinophil count ≤300 cells/μL (or >300 cells/μL), patients with 12 to 16 measurements were allowed to have 2 eosinophil counts ≤300 cells/μL (or >300 cells/μL), etc.

Sensitivity analysis 3: Classification was based on the mean eosinophil count from day −365 to 0, using the same thresholds as the main analysis.

Sensitivity analysis 4: Patients with a maximum eosinophil count >150 cells/μL from day −365 to 0 were classified as type 2 inflammation-positive; others as negative.

**Abbreviations:** CI, confidence interval; COPD, chronic obstructive pulmonary disease.


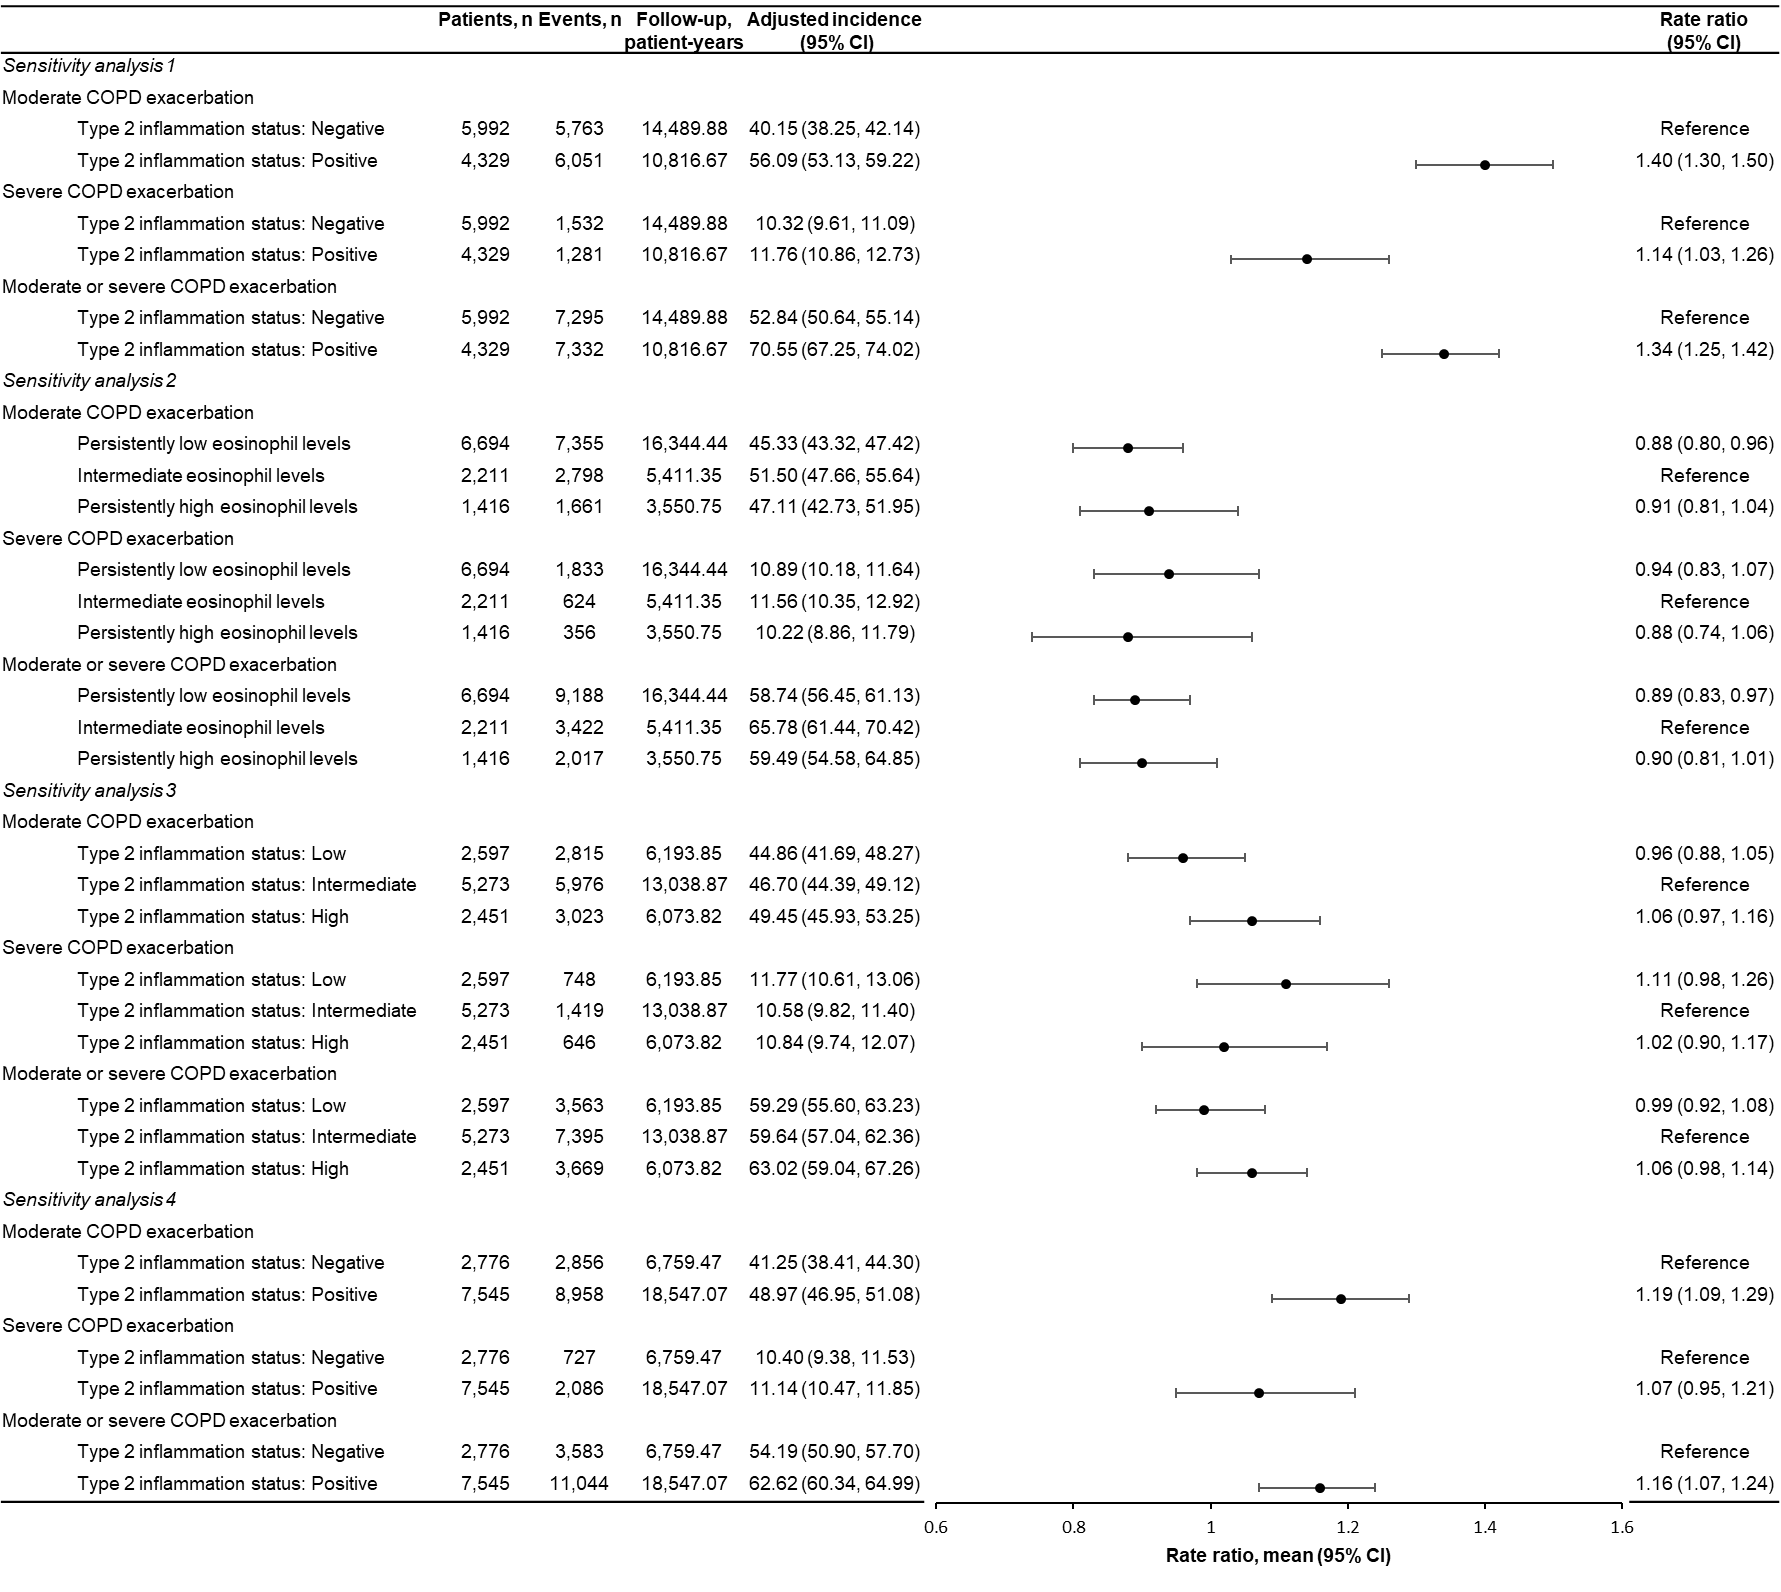


### **Supplementary Figure 2** **Sensitivity analyses of adjusted incidence rates and rate ratios for MACE (secondary outcome) using alternative definitions of type 2 inflammation status**.

### Sensitivity analysis 1: Patients with ≥2 eosinophil measurements >300 cells/μL from day −365 to 1,095 were classified as type 2 inflammation-positive; others were classified as negative. Sensitivity analysis 2: A beta distribution model applied to eosinophil counts from day −365 to 0 classified patients as having persistently high (probability that the proportion of eosinophil counts >300 cells/μL exceeding 0.75 was larger than 0.7), persistently low (probability that the proportion of eosinophil counts ≤300 cells/μL exceeding 0.75 was larger than 0.7), or intermediate eosinophil levels (otherwise); ie, to qualify as persistently high (or low), patients with 3 to 6 measurements were not allowed to have any eosinophil count ≤300 cells/μL (or >300 cells/μL), patients with 7 to 11 measurements were allowed to have only 1 eosinophil count ≤300 cells/μL (or >300 cells/μL), patients with 12 to 16 measurements were allowed to have 2 eosinophil counts ≤300 cells/μL (or >300 cells/μL), etc.

Sensitivity analysis 3: Classification was based on the mean eosinophil count from day −365 to 0, using the same thresholds as the main analysis.

Sensitivity analysis 4: Patients with a maximum eosinophil count >150 cells/μL from day −365 to 0 were classified as type 2 inflammation-positive; others as negative.

Abbreviations: CI, confidence interval; MACE, major adverse cardiovascular event.

###
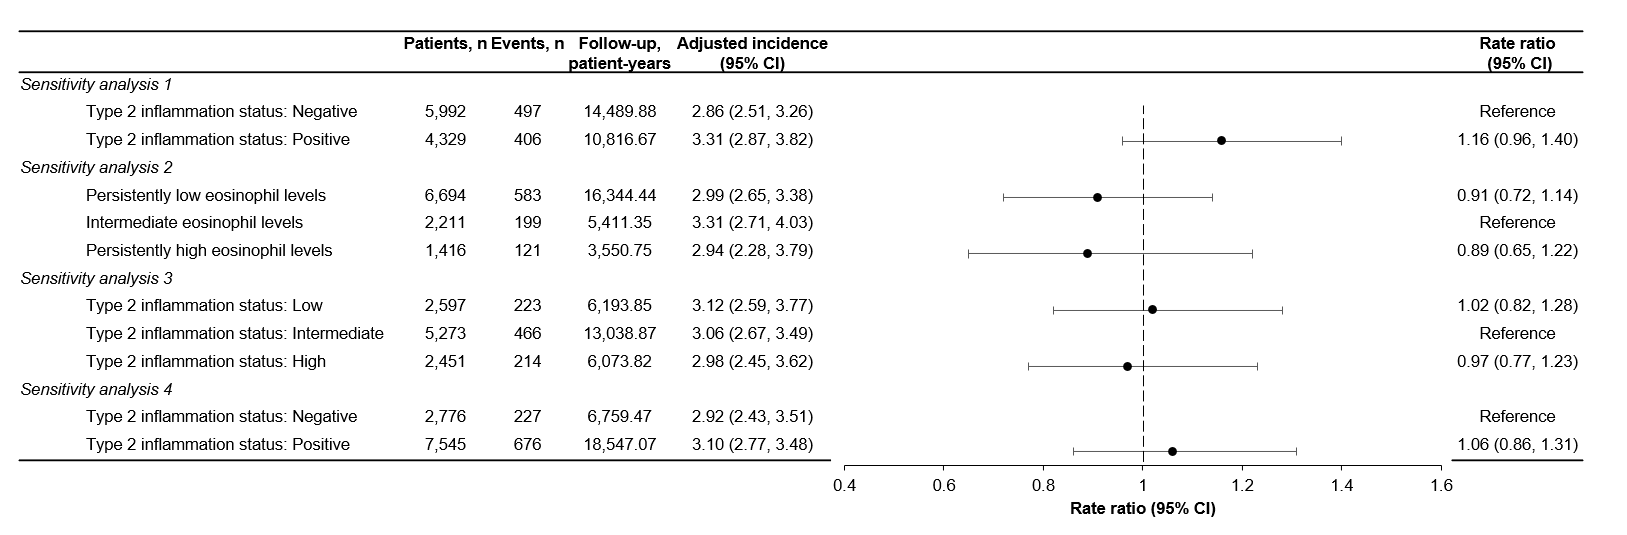

Supplement: Supplementary file 1 [file 586341%20Revised%20Supplementary%20Materials.docx]
